# Supplementary material for: The Effect of Lactiplantibacillus plantarum BX62 Alone or in Combination with Chitosan on the Qualitative Characteristics of Fresh-Cut Apples during Cold Storage
Source: MDPI journal article supplement (doi:10.3390/microorganisms9112404), 2021-11-22
Supplement: s1 [file s1]

**Table S1.** Correlation between some selected quality parameters of fresh-cut apples in different groups during cold storage

| Index        | Pearson correlation coefficient (r) |        |         |           |
|--------------|-------------------------------------|--------|---------|-----------|
|              | Control                             | CT     | BX62    | CT + BX62 |
| TA vs. AMB   | 0.188                               | -0.250 | -0.257  | 0.118     |
| TA vs. APB   | 0.183                               | -0.250 | 0.436   | -0.590    |
| TA vs. YAMs  | 0.452                               | -0.250 | 0.881 * | -0.590    |
| TA vs. LAB   | --                                  | --     | -0.638  | -0.110    |
| TPC vs. AMB  | -0.957 *                            | 0.198  | -0.070  | 0.623     |
| TPC vs. APB  | -0.562                              | 0.198  | -0.286  | -0.066    |
| TPC vs. YAMs | -0.548                              | 0.198  | -0.551  | -0.066    |
| TPC vs. LAB  | --                                  | --     | 0.205   | 0.456     |
| PPO vs. AMB  | -0.671                              | -0.392 | 0.379   | 0.479     |
| PPO vs. APB  | -0.360                              | -0.392 | -0.685  | -0.112    |
| PPO vs. YAMs | -0.349                              | -0.392 | -0.604  | -0.112    |
| PPO vs. LAB  | --                                  | --     | 0.469   | 0.287     |

\* The value was significant at  $P < 0.05$ . TA = titratable acidity, TPC = total phenolics content (TPC), PPO = polyphenol oxidase, AMB = aerobic mesophilic bacteria, APB = aerobic psychrophilic bacteria, YAMs = yeast and molds, LAB = lactic acid bacteria.

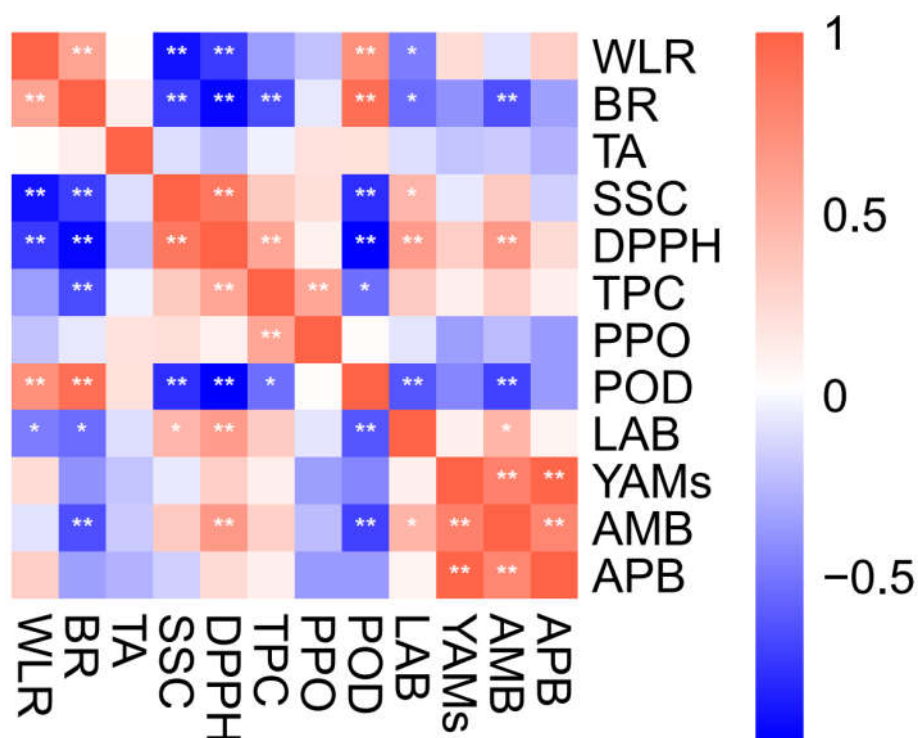

**Figure S1.** Heat map of correlation between physicochemical and microbial indexes of fresh-cut apples during storage. \*\* The value was significant at  $P < 0.01$ , \* The value was significant at  $P < 0.05$ . WLR = weight loss rate; BR = Browning rate; SSC = soluble solids content; POD = peroxidase activity.
